# Supplementary material for: Steroid conversion with CYP106A2 – production of pharmaceutically interesting DHEA metabolites
Source: PubMed Central journal article supplement (PMC4080778; doi:10.1186/1475-2859-13-81), 2014-06-05
Supplement: 1475-2859-13-81-S1.pdf [file 1475-2859-13-81-S1.pdf]

Additional material:

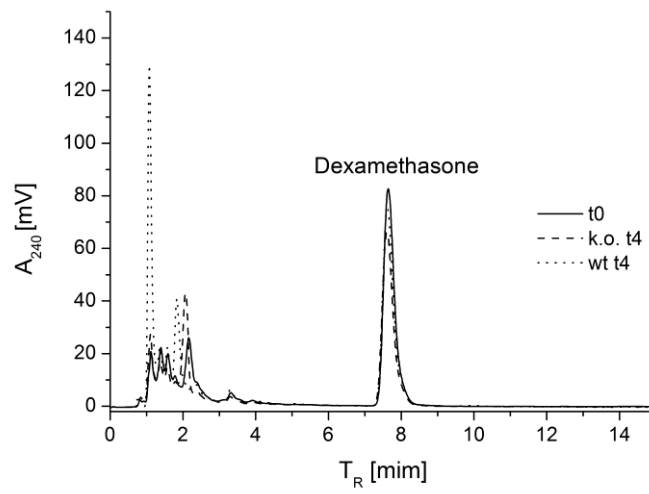

Figure S1: HPLC chromatogram of dexamethasone conversion with *B. megaterium* ATCC13368

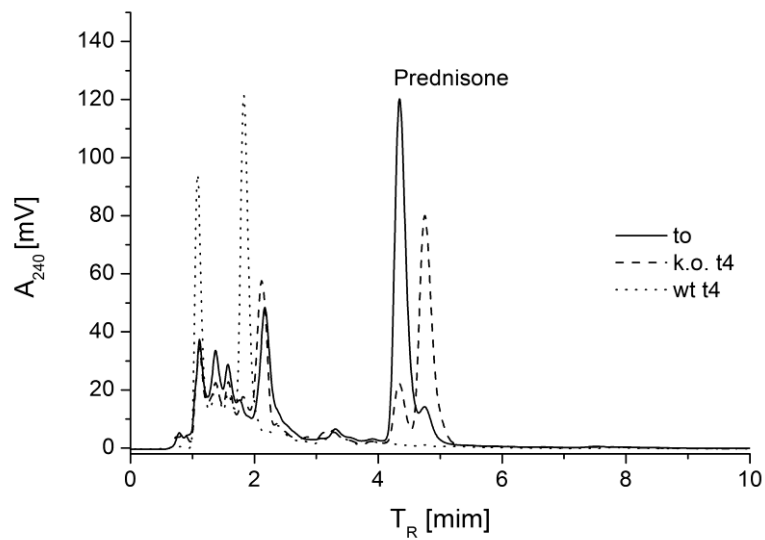

Figure S2: HPLC-chromatogram of prednisone conversion with *B. megaterium* ATCC13368

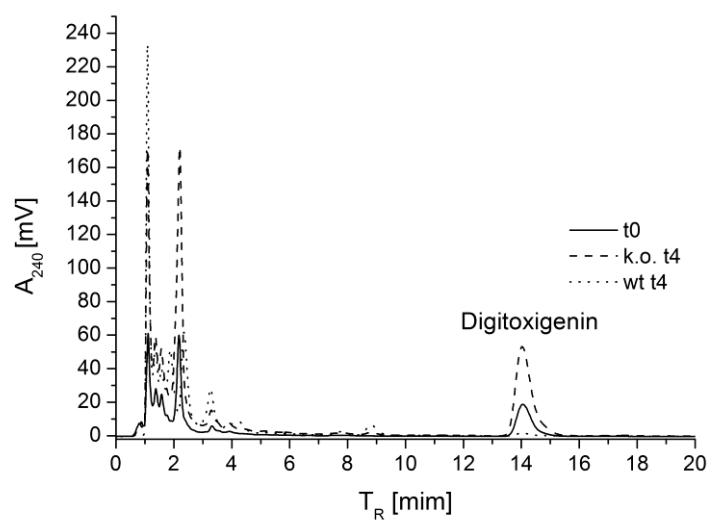

Figure S3: HPLC-chromatogram of digitoxigenin conversion with *B. megaterium* ATCC13368

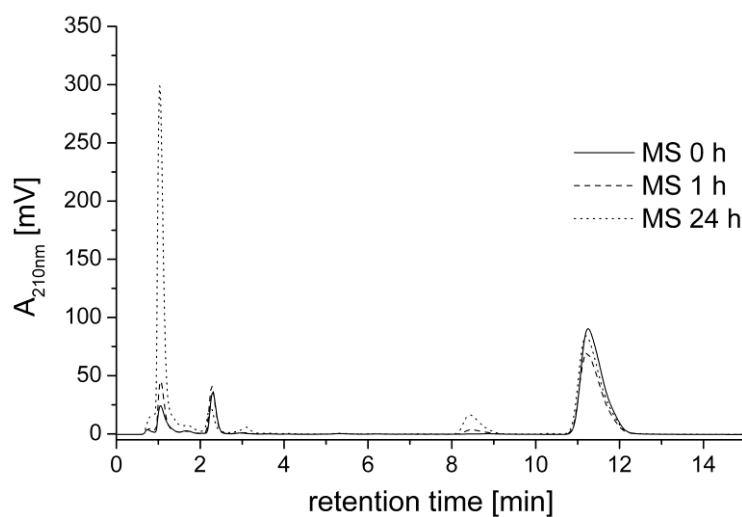

Figure S4: HPLC-chromatogram of DHEA-conversion with *B. megaterium* MS941 without expression plasmid.

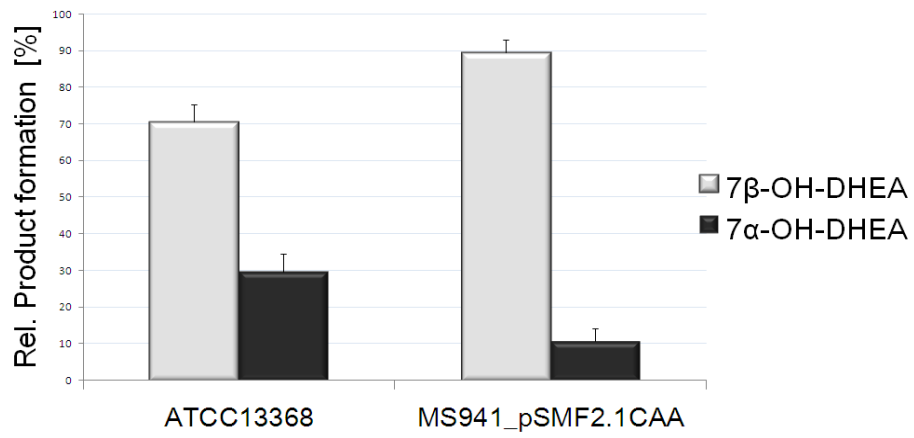

**Figure S5: Selectivity of DHEA-hydroxylation with the *B. megaterium* ATCC13368 wild type strain compared with the *B. megaterium* MS941\_pSMF2.1CAA overexpression strain**
